# Supplementary material
Source: PubMed Central journal article supplement (PMC9633329)
Supplement: sxac006_suppl_supplementary_figures.pdf [file sxac006_suppl_supplementary_figures.pdf]

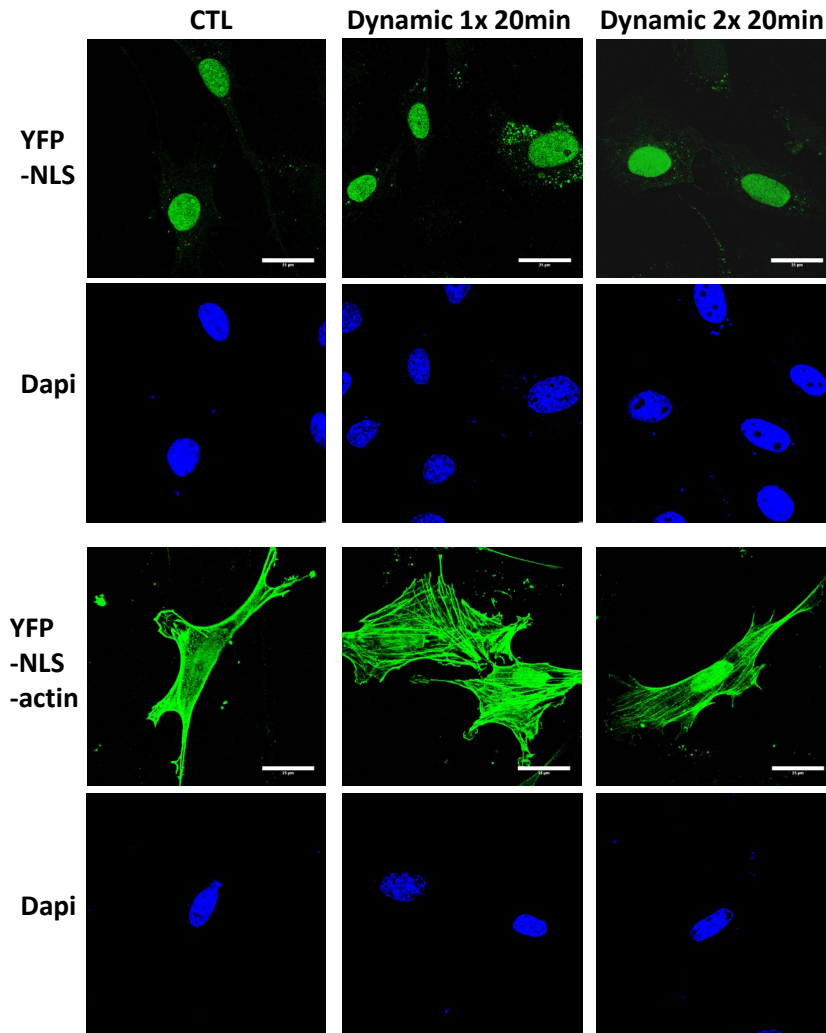

**Supplemental 1. YFP-NLS is intranuclear while YFP-NLS-Actin is found in the cytoplasm.**

YFP-NLS (Addgene, Cat#145274) and YFP-NLS- $\beta$ Actin (Addgene, Cat#60613) were overexpressed in MSC and applied single or double time of 2% dynamic strain same as that in fig 3, scale bar = 25  $\mu$ m. More YFP-NLS-actin is seen intranuclear after the second bout of strain.

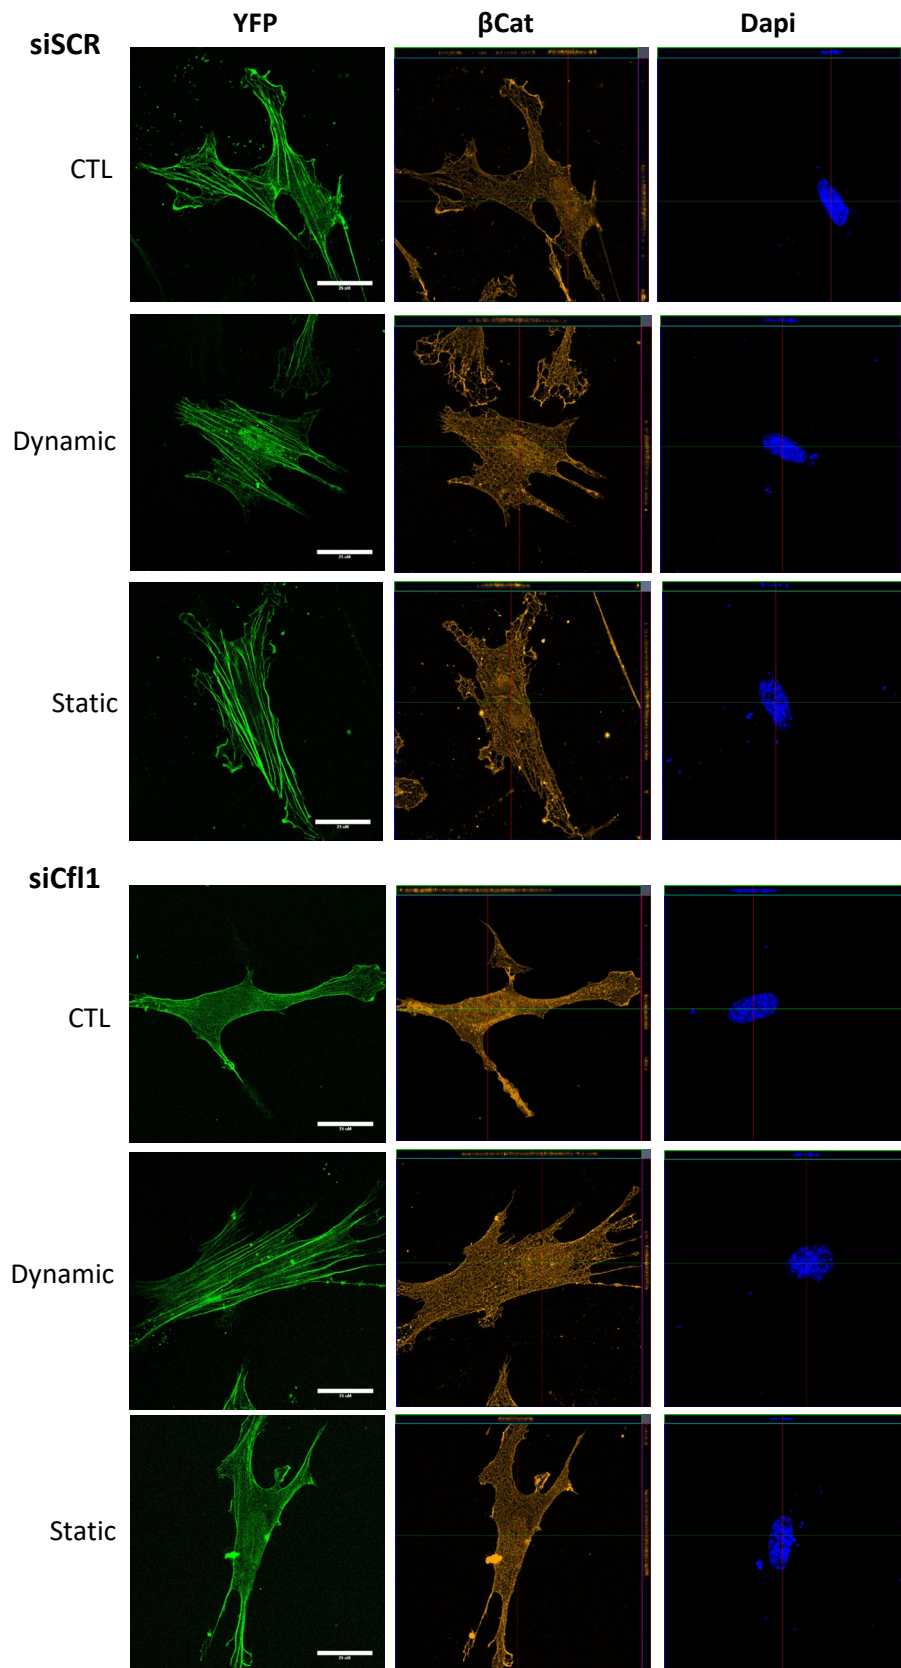

**Supplemental 2. Dynamic vs static strain in YFP-expressing cells).** MSC overexpressing YFP-NLS- $\beta$ Actin (Addgene, Cat#60613) in +/- knock-down of Cfl1 or Ipo9 were subject to 2% dynamic or % static strain before stain with anti- $\beta$ cat (yellow) and DAPI (blue), scale bar = 25  $\mu$ m.
